# Supplementary material
Source: publisher figshare collection journal article supplement (https://karger.figshare.com/ndownloader/files/17708432)
Supplement: Supplementary file 1 [file 17708432]

**Figure S1. Flowchart of recruitment**

**
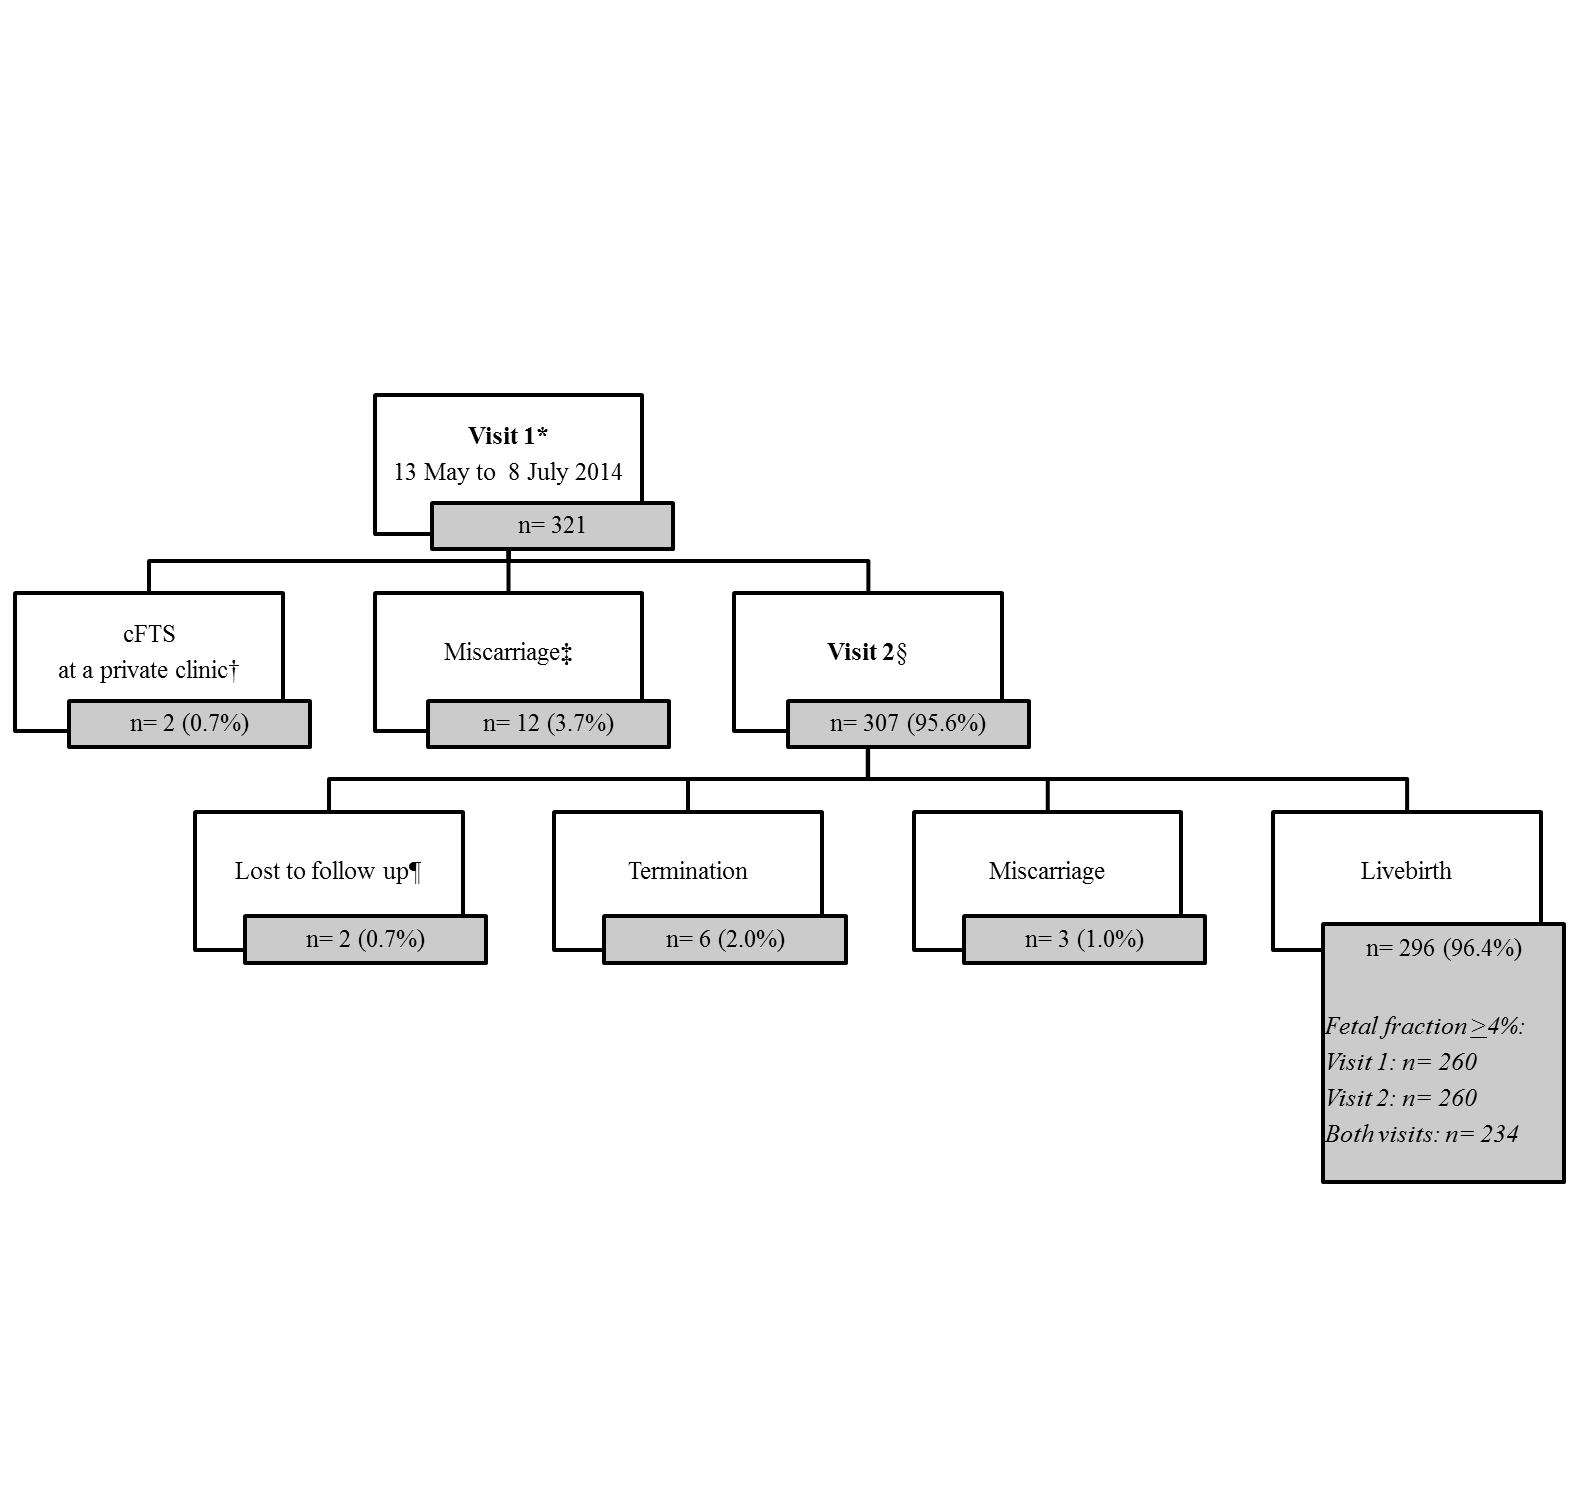
**

*Visit 1: Blood collection for biochemical markers (PAPP-A and β-hCG) and 1st cfDNA testing (n=321).

†Livebirth (n=2).

‡Seven miscarriages diagnosed before Visit 2 and five diagnosed at Visit 2.

§Visit 2: Combined first trimester risk assessment AND 2nd cfDNA testing (n=290), and only cFTS (n=17).

Missing 2nd cfDNA testing is caused by transport (n=4), cFTS at another hospital (n=6), changing date of appointment for cFTS (n=6), and declining 2nd blood collection (n=1).

¶Lost to follow up (n=2), one due to emigration.
